# Supplementary material
Source: PubMed Central journal article supplement (PMC5226115)
Supplement: NIHMS829379-supplement-supplement_1.pdf [file NIHMS829379-supplement-supplement_1.pdf]

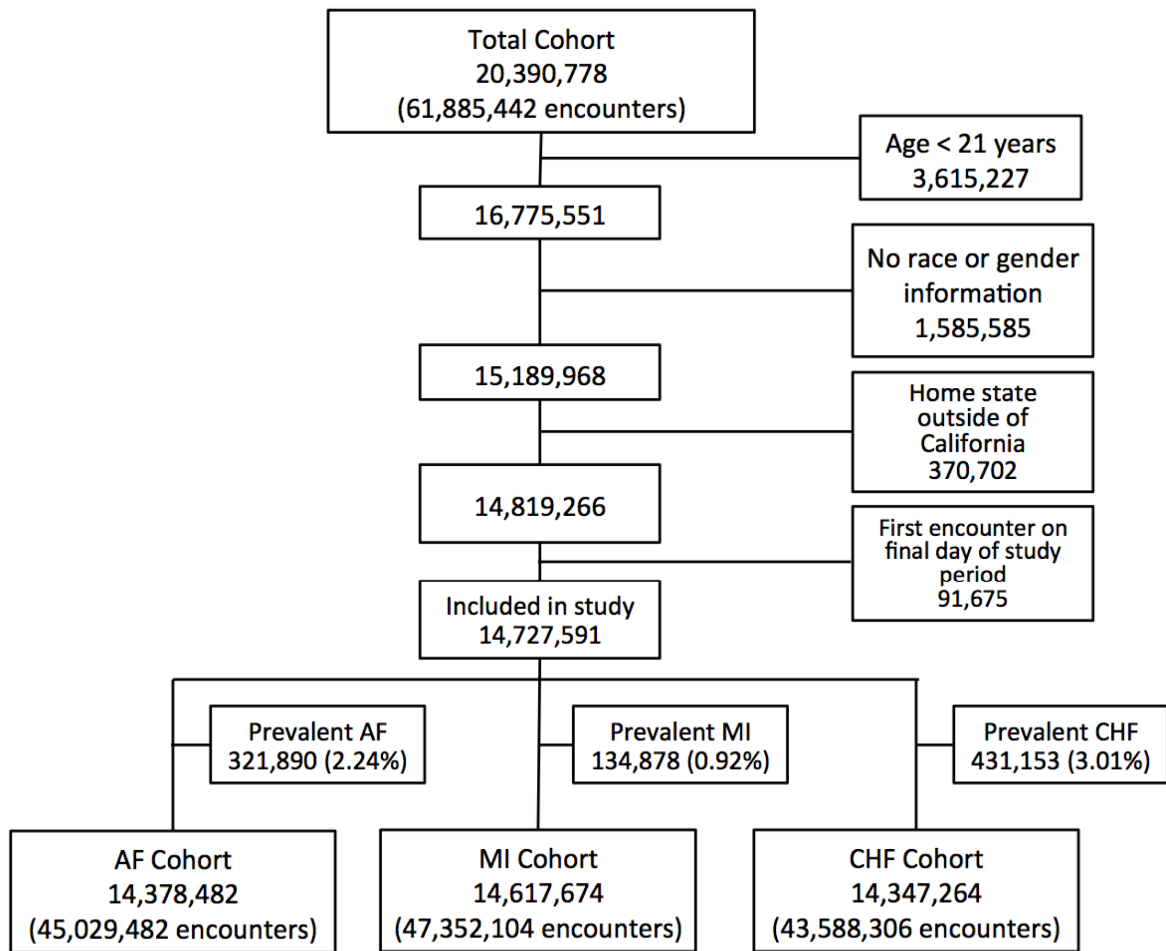

### Cumulative Probability of Esophageal Varices or Cirrhosis

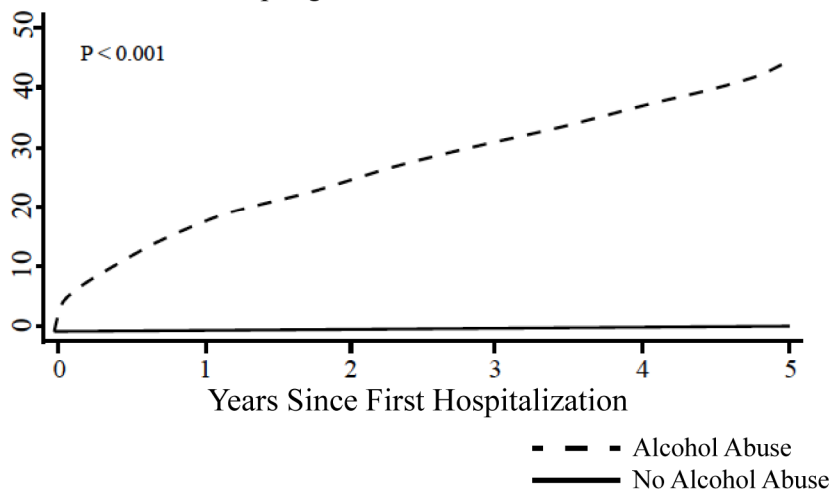

### Unadjusted Cumulative Probability of Atrial Fibrillation

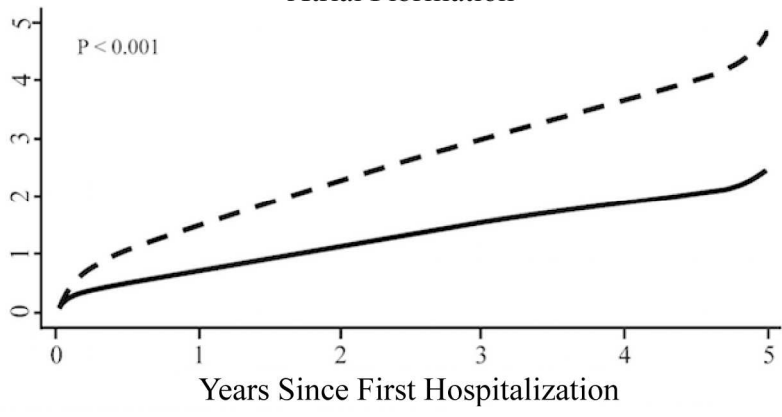

A

--- Alcohol Abuse  
— No Alcohol Abuse

# Age-Sex Adjusted Cumulative Probability of Atrial Fibrillation

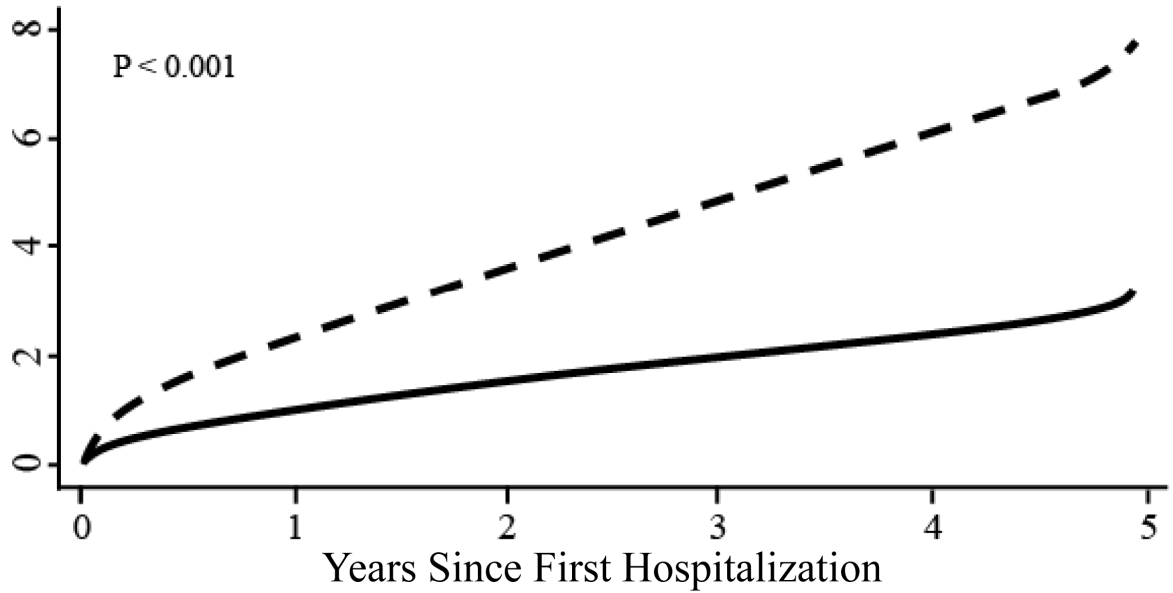

**B**

--- Alcohol Abuse  
— No Alcohol Abuse

# Unadjusted Cumulative Probability of Myocardial Infarction

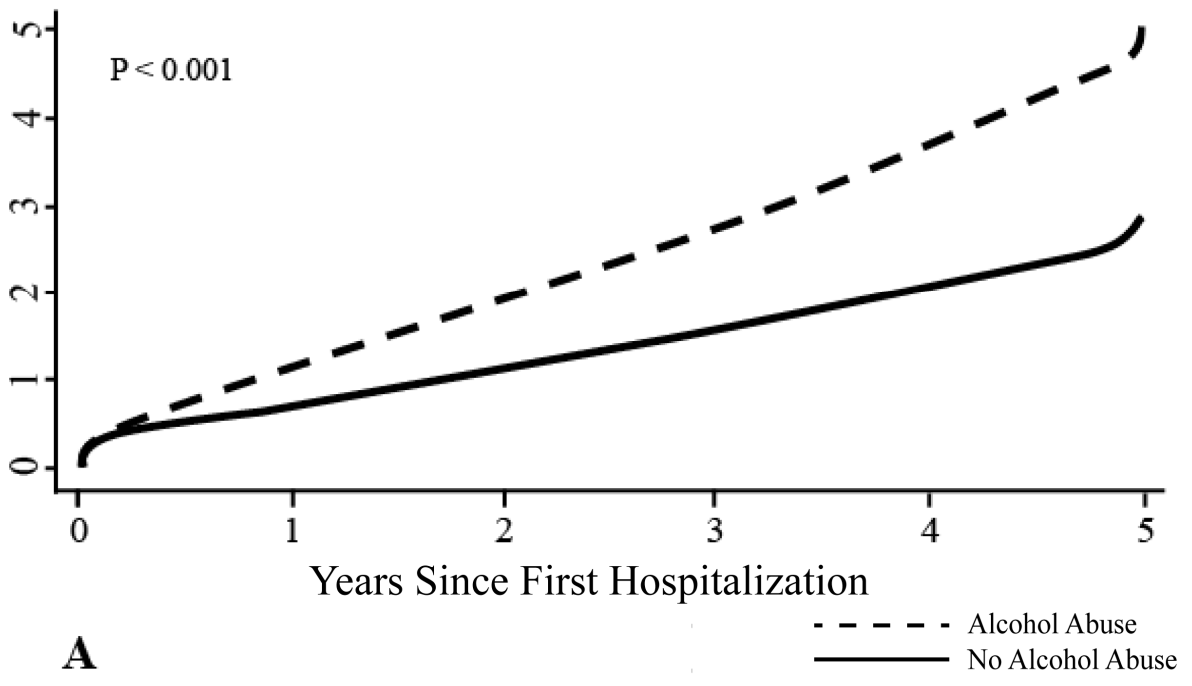

# Age-Sex Adjusted Cumulative Probability of Myocardial Infarction

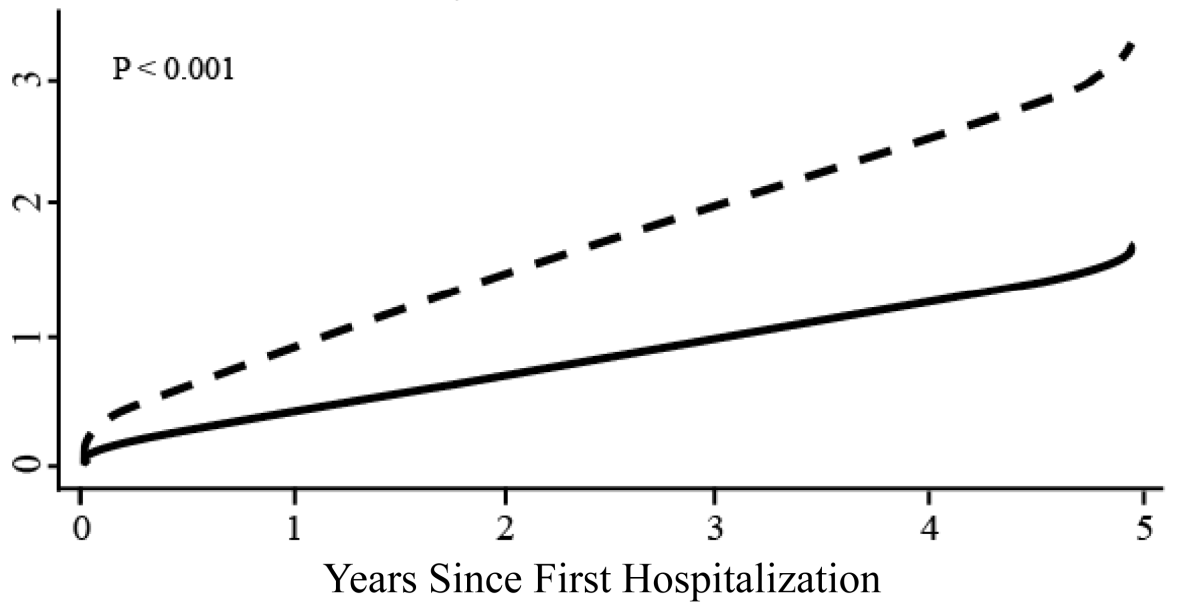

**B**

--- Alcohol Abuse  
— No Alcohol Abuse

# Unadjusted Cumulative Probability of Congestive Heart Failure

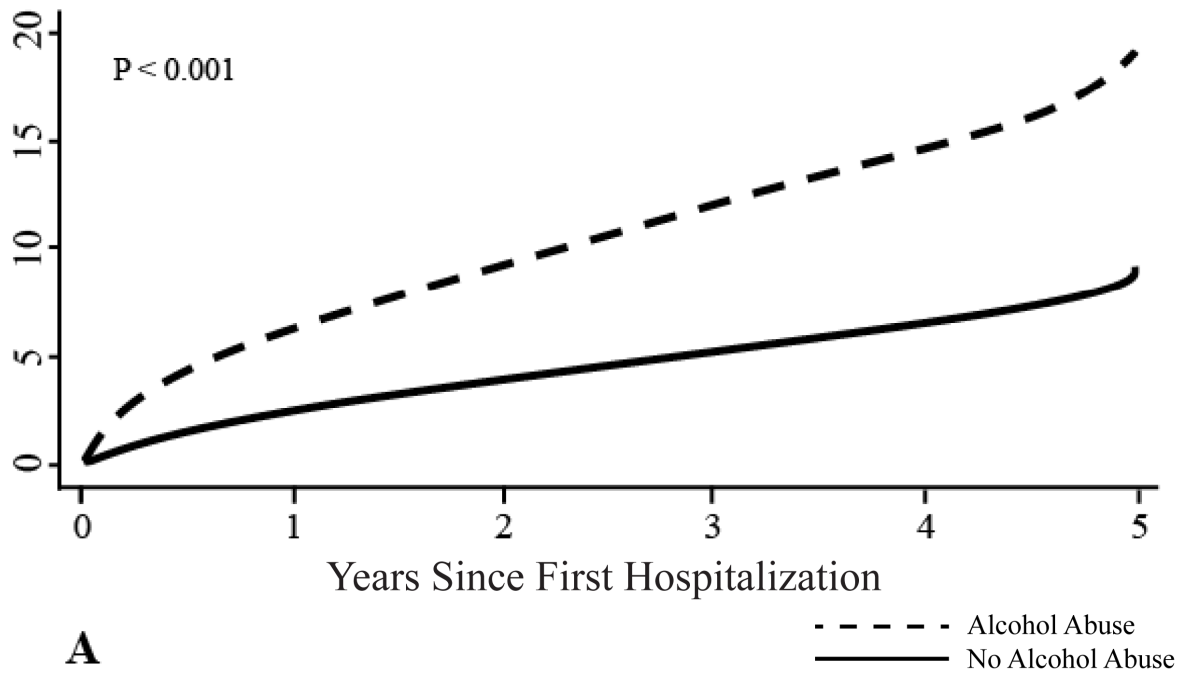

**A**

# Age-Sex Adjusted Cumulative Probability of Congestive Heart Failure

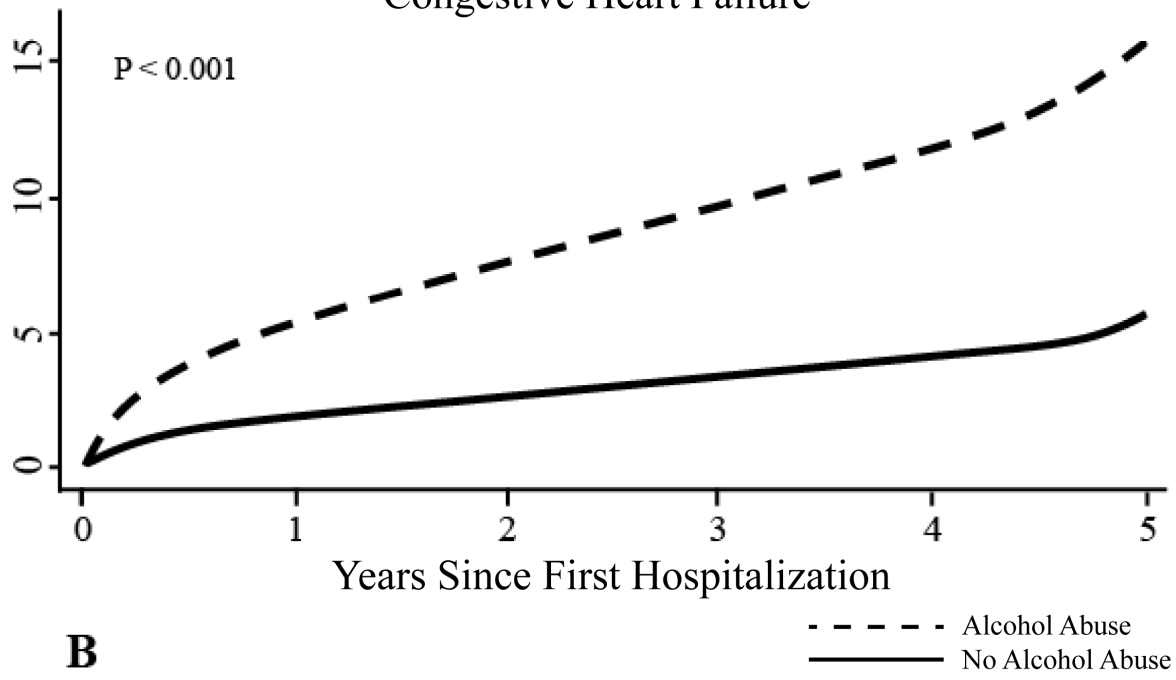



## **Appendix**

### **Appendix Figure Legends**

**Appendix Figure 1: Patients in the California Healthcare Cost and Utilization Project between January 1, 2005 and December 31, 2009 and Included in the Analysis.**

AF, atrial fibrillation; CHF, congestive heart failure; MI, myocardial infarction.

**Appendix Figure 2: Cumulative Probability of Esophageal Varices or Cirrhosis by Presence or Absence of Alcohol Abuse.**

These curves were generated under a proportional hazards assumption. Model is adjusted for age, sex, race, hypertension, diabetes, coronary artery disease, congestive heart failure, chronic kidney disease, valvular heart disease, dyslipidemia, obesity, obstructive sleep apnea, cigarette smoking, and income.

**Appendix Figure 3: (A) Unadjusted and (B) Age and Sex Adjusted Incidence of Atrial Fibrillation by Presence or Absence of Alcohol Abuse.**

These curves were generated under a proportional hazards assumption. Age by decade was used in adjustment.

**Appendix Figure 4: (A) Unadjusted and (B) Age and Sex Adjusted Incidence of Myocardial Infarction by Presence or Absence of Alcohol Abuse.**

These curves were generated under a proportional hazards assumption. Age by decade was used in adjustment.

**Appendix Figure 5: (A) Unadjusted and (B) Age and Sex Adjusted Incidence of Congestive Heart Failure by Presence or Absence of Alcohol Abuse.**

These curves were generated under a proportional hazards assumption. Age by decade was used in adjustment.

**Appendix Table 1: International Classification of Diseases-9th Edition (ICD-9) and Current Procedural Terminology (CPT) Codes Used for Disease Identification**

| <b>Diagnosis</b>                            | <b>ICD-9/CPT Code*</b> |                                                                                                                                                                  |
|---------------------------------------------|------------------------|------------------------------------------------------------------------------------------------------------------------------------------------------------------|
| Alcohol abuse                               | ICD-9                  | 291.0, 291.1, 291.3, 291.4, 291.81, 303, 303.0, 303.00, 303.01, 303.02, 303.03, 303.9, 303.90, 303.91, 303.92, 303.93, 305.0                                     |
| Myocardial infarction                       | ICD-9                  | 410.X                                                                                                                                                            |
| Congestive heart failure, systolic or mixed | ICD-9                  | 402.01, 402.11, 402.91, 404.01, 404.03, 404.11, 404.13, 404.91, 404.93, 425.1, 425.4, 425.5, 425.7, 425.8, 425.9, 428.0, 428, 428.1, 428.2, 428.4, 428.40, 428.9 |
| Congestive heart failure, diastolic only    | ICD-9                  | 428.3, 428.30                                                                                                                                                    |
| Atrial fibrillation                         | ICD-9                  | 427.3, 427.31                                                                                                                                                    |
| Hypertension                                | ICD-9                  | 437.2, 401.X, 402.X, 403.X, 404.X, 405.X                                                                                                                         |
| Diabetes mellitus                           | ICD-9                  | 249.X, 250.X, 790.X, 791.5, 791.6, V458.5, V539.1, V654.6                                                                                                        |
| Coronary artery disease                     | ICD-9                  | 36.01, 36.02, 36.03, 36.05, 36.09, 36.1X, 411.0, 411.1, 411.8, 411.89, 412, 413.X, 414.X, 429.7, V458.2                                                          |
| Chronic kidney disease                      | ICD-9                  | 39.93, 54.98, 585.X, V420, V451, V451.1, V451.2, V560, V561, V562, V563.1, V563.2, V568, V56                                                                     |
|                                             | CPT                    | 90921, 90925, 90935, 90937, 90945, 90947, 90989, 90993                                                                                                           |
| Valvular heart disease                      | ICD-9                  | 394.X, 395.X, 396.X, 397.0, 397.1, 424.0, 424.1, 424.2, 424.3, V422, V433                                                                                        |
| Dyslipidemia                                | ICD-9                  | 272, 272.X                                                                                                                                                       |
| Active smoking                              | ICD-9                  | 305.1                                                                                                                                                            |
| Cardiac Surgery                             | ICD-9                  | 35.3X, 35.4X, 35.5X, 35.6X, 35.7X, 36.1X, 37.1X, 37.2X, 37.3X, 37.40                                                                                             |
| Cirrhosis                                   | ICD-9                  | 571, 571.0, 571.1, 571.2, 571.3, 571.5, 571.6, 571.8, 571.9                                                                                                      |
| Esophageal varices                          | ICD-9                  | 456.0, 456.1, 456.2, 456.20, 456.21                                                                                                                              |
|                                             | CPT                    | 43204, 43205, 43243, 43244                                                                                                                                       |

\*X delineates a possibility of any of multiple integers (0-9) representing more specific descriptions still falling within the listed diagnosis term.

**Appendix Table 2: Incidence of Atrial Fibrillation, Myocardial Infarction, and Congestive Heart Failure by Patient Subgroups**

|                           | <b>Atrial<br/>Fibrillation‡<br/>n = 14 378 483</b> | <b>Myocardial<br/>Infarction<br/>n = 14 286 472</b> | <b>Congestive Heart<br/>Failure<br/>n = 14 043 590</b> |
|---------------------------|----------------------------------------------------|-----------------------------------------------------|--------------------------------------------------------|
| Overall                   | 7.4 (7.4-7.4)                                      | 3.1 (3.0-3.1)                                       | 10.0 (10.0-10.0)                                       |
| Male                      | 8.9 (8.7-8.9)                                      | 3.8 (3.8-3.8)                                       | 11.3 (11.2-11.3)                                       |
| Female                    | 6.4 (6.3-6.4)                                      | 2.5 (2.5-2.5)                                       | 9.1 (9.0-9.1)                                          |
| Age                       |                                                    |                                                     |                                                        |
| ≥ 60 yr.                  | 21.3 (21.1-21.4)                                   | 7.6 (7.6-7.7)                                       | 26.6 (26.5-26.7)                                       |
| < 60 yr.                  | 1.2 (1.2-1.2)                                      | 0.9 (0.9-0.9)                                       | 2.6 (2.5-2.6)                                          |
| Race                      |                                                    |                                                     |                                                        |
| White                     | 9.1 (9.1-9.2)                                      | 3.2 (3.1-3.2)                                       | 10.5 (10.4-10.5)                                       |
| Black                     | 5.3 (5.2-5.3)                                      | 3.2 (3.1-3.3)                                       | 12.0 (11.9-12.1)                                       |
| Hispanic                  | 4.4 (4.3-4.4)                                      | 2.4 (2.4-2.4)                                       | 7.8 (7.8-7.9)                                          |
| Asian/Pacific<br>Islander | 6.7 (6.6-6.7)                                      | 3.2 (3.1-3.2)                                       | 9.3 (9.2-9.4)                                          |
| Native<br>American        | 8.4 (7.9-8.9)                                      | 4.4 (4.1-4.8)                                       | 14.6 (14.0-15.3)                                       |
| Other                     | 8.6 (8.5-8.7)                                      | 4.5 (4.4-4.6)                                       | 13.2 (13.1-13.4)                                       |

Incidence rates are events per 1,000 person-years (95% confidence interval)

**Appendix Table 3: Association between Alcohol Abuse and Incident Esophageal Varices or Cirrhosis.**

| <b>Hazard</b> |              |               |                |
|---------------|--------------|---------------|----------------|
|               | <b>Ratio</b> | <b>95% CI</b> | <b>P-value</b> |
| Unadjusted    |              |               |                |
| Alcohol Abuse | 191.6        | 188.4-194.8   | <0.0001        |
| Adjusted      |              |               |                |
| Alcohol Abuse | 132.6        | 130.7-134.4   | <0.0001        |

CI, confidence interval

Model is adjusted for age, sex, race, hypertension, diabetes, coronary artery disease, congestive heart failure, chronic kidney disease, valvular heart disease, dyslipidemia, obesity, obstructive sleep apnea, cigarette smoking, and income.

**Table 4: Risk of Atrial Fibrillation, Myocardial Infarction, and Congestive Heart Failure with Alcohol Abuse.**

|                                | <b>Atrial Fibrillation</b> |                | <b>Myocardial Infarction</b> |                | <b>Congestive Heart Failure</b> |                |
|--------------------------------|----------------------------|----------------|------------------------------|----------------|---------------------------------|----------------|
| <b>Risk with Alcohol Abuse</b> | <b>HR (95% CI)</b>         | <b>P value</b> | <b>HR (95% CI)</b>           | <b>P value</b> | <b>HR (95% CI)</b>              | <b>P value</b> |
| Unadjusted                     | 2.1 (1.9-2.3)              | <0.0001        | 2.0 (1.8-1.3)                | <0.0001        | 2.4 (2.2-2.6)                   | <0.0001        |
| Adjusted*                      | 2.2 (2.0-2.4)              | <0.0001        | 1.4 (1.3-1.6)                | <0.0001        | 2.4 (2.2-2.5)                   | <0.0001        |

CI, confidence interval; HR, hazard ratio

\* Each model is adjusted for age, sex, race, hypertension, diabetes, coronary artery disease (for the AF and CHF outcomes), congestive heart failure (for the AF and MI outcomes), chronic kidney disease, valvular heart disease (for the AF and CHF outcomes), dyslipidemia, obesity, obstructive sleep apnea, cigarette smoking, and income.

**Appendix Figure 1: Patients in the California Healthcare Cost and Utilization Project between January 1, 2005 and December 31, 2009 and Included in the Analysis.**

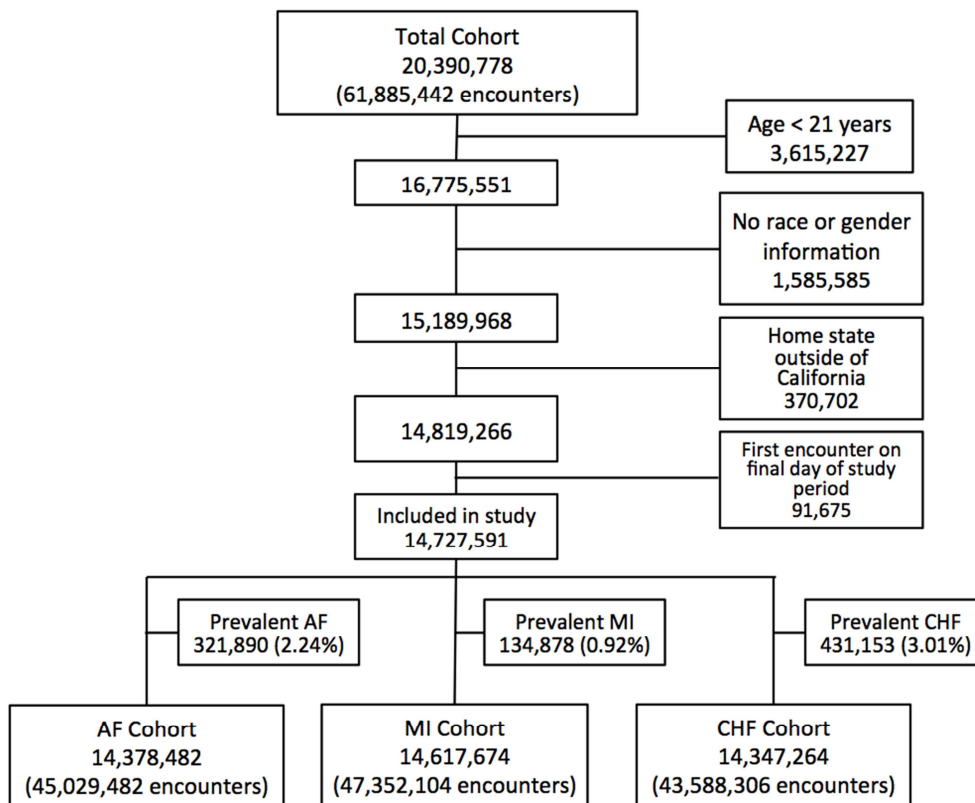

AF, atrial fibrillation; CHF, congestive heart failure; MI, myocardial infarction.

**Appendix Figure 2: Cumulative Probability of Esophageal Varices or Cirrhosis by Presence or Absence of Alcohol Abuse**

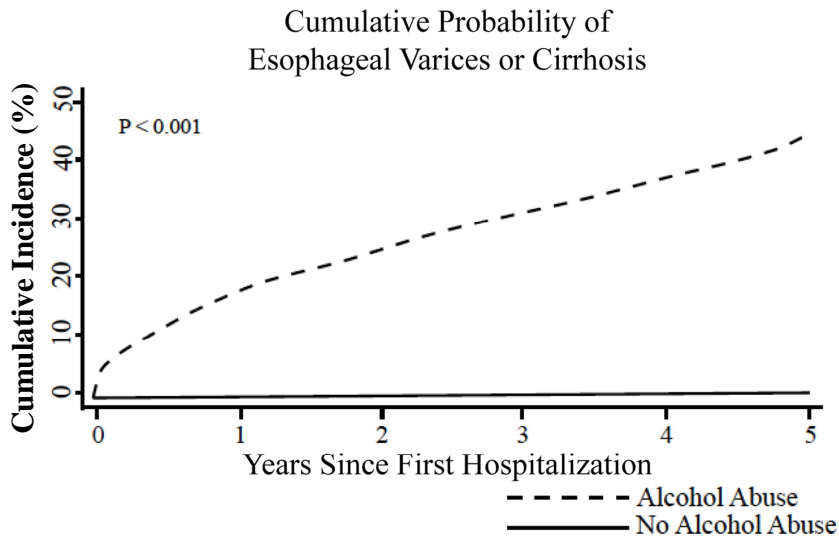

These curves were generated under a proportional hazards assumption. Model is adjusted for age, sex, race, hypertension, diabetes, coronary artery disease, congestive heart failure, chronic kidney disease, valvular heart disease, dyslipidemia, obesity, obstructive sleep apnea, cigarette smoking, and income.



**Appendix Figure 3: (A) Unadjusted and (B) Age and Sex Adjusted Cumulative Probability of Atrial Fibrillation by Presence or Absence of Alcohol Abuse.**

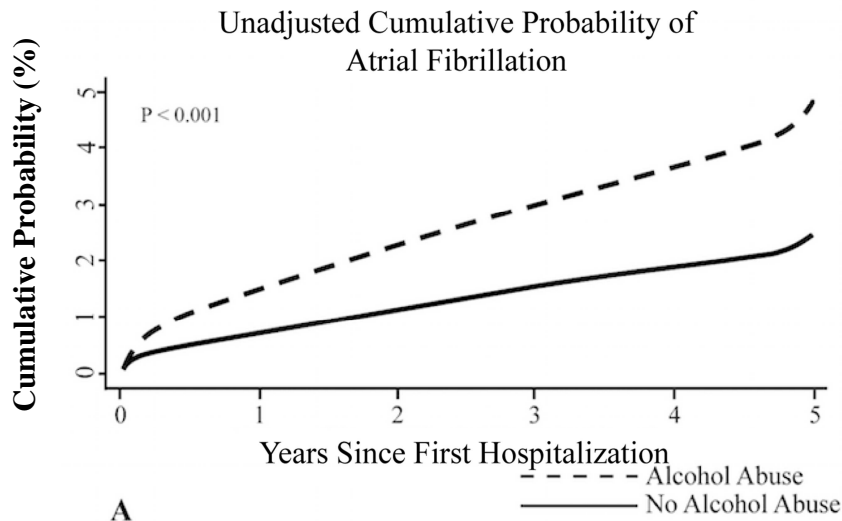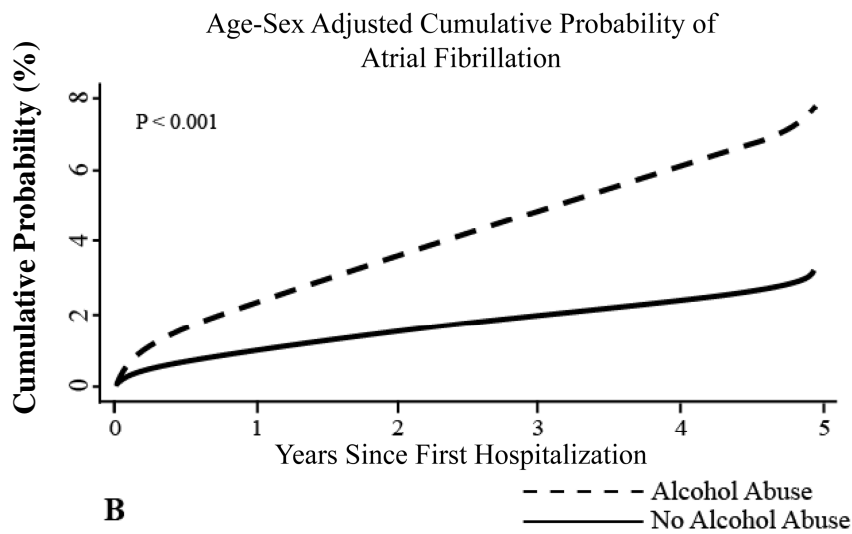

These curves were generated under a proportional hazards assumption. Age by decade was used in adjustment.

**Appendix Figure 4: (A) Unadjusted and (B) Age and Sex Adjusted Cumulative Probability of Myocardial Infarction by Presence or Absence of Alcohol Abuse.**

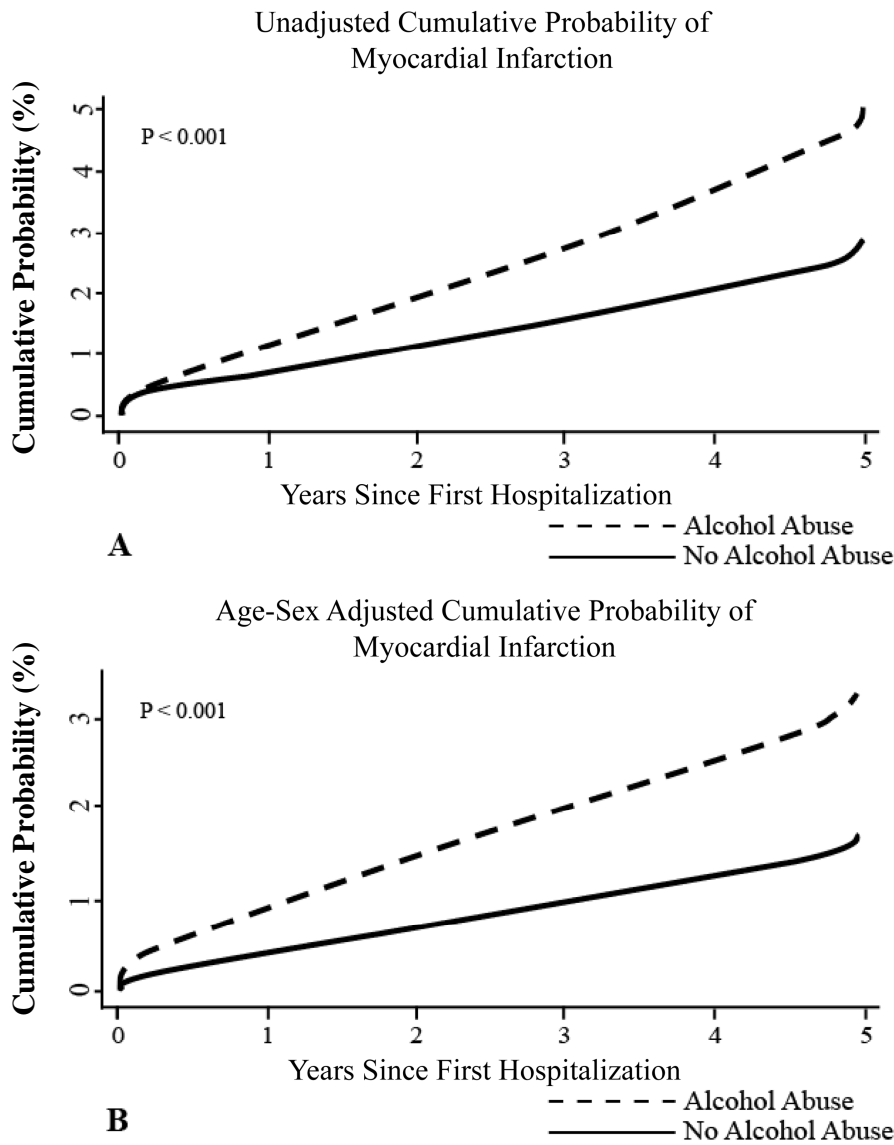

These curves were generated under a proportional hazards assumption. Age by decade was used in adjustment.

**Appendix Figure 5: (A) Unadjusted and (B) Age and Sex Adjusted Cumulative Probability of Congestive Heart Failure by Presence or Absence of Alcohol Abuse.**

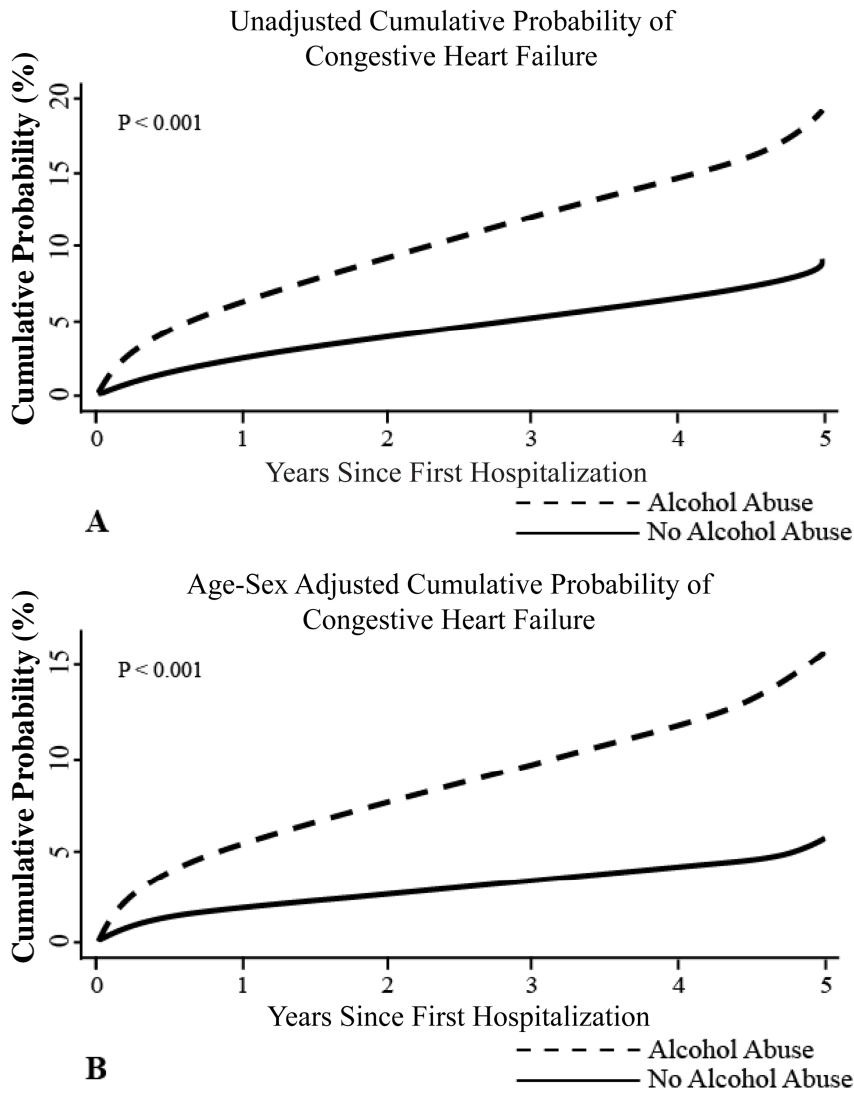

These curves were generated under a proportional hazards assumption. Age by decade was used in adjustment.
